# Supplementary material for: Structure of an MmyB-Like Regulator from C. aurantiacus, Member of a New Transcription Factor Family Linked to Antibiotic Metabolism in Actinomycetes
Source: PubMed Central journal article supplement (PMC3406030; doi:10.1371/journal.pone.0041359), 2012-07-26
Supplement: pone.0041359.s001.pdf [file pone.0041359.s001.pdf]

MltR -----MERAAFGKLVQALRREH-----RDEKGRVWTQEVLAER  
SCO7140 -----MADRAALAAF**LRARREALQ**PEDVGLP---RG-RR**RRTPGLRREEVAAL**  
SCO2501 (8)QSPPRDTGSEIRRHELAA**FLRSRRERIA**PEQVGLP---RG-RR**RRTPGLRREEVAQL**  
SCO7817 -----MAD**FLRHRREALR**PEDVGLS---PG-AR**RRARGLRREEVAAL**  
SCO0307 -----MSSELGDF**LKARRRELS**PPTAGLP---AD-GR**RRVPGLRREEVAVL**  
SCO0110 -----MPTNTNRAELRDF**LRSSRRARVS**PEDVGLP---AT-VR**RRTPGLRREEVAQL**  
SCO2537 --MITRAGTAGRDRRSELREF**LMSRRARVS**PAEVGLP---DGGAR**RRTPGLRREEVAVL**  
SCO7767 -----MSSQELADF**LRRRREDLR**PEDVQAE(5)SR-RA**RRTPGLRREEVAAL**  
SCO0236 -----MKDESGNRLG**SYLRARRELIT**PAQAGIP---PG-GN**RRVPGLRREEVALL**  
SCO4680 -----MKYAE**LGSFLRSRRERIR**PADVGLP---AG-PR**RRVPGLRREEVAHL**  
SCO7706 -----MDDNHLG**EFLRARRAGLR**PQDVNMA---SH-GL**RRVAGLRREEVAVL**  
SCO0233 -----MIDRSGLAQ**FLRHRREALQ**PEDVGLP---RG-RR**RRTPGLRREEVAAL**  
SCO0891 -----MTATEFG**RALLRRDRVS**PEAAGLP---AG-GH**RRAGLRREELALL**  
SCO4944 -----MDGQLDRRAELSE**FLRTRRARLK**PEDVGLE---SYGR**RRVPGLRREELAQL**  
MmyB (8)KD-STVCS**PKRQREALRHF**LRSSRRARLS**PDDVGLL**---AT-GR**RHTPGLRREEVAVI**  
LlpRV -----MDDNHLG**DFLRARRAALR**PHDVGM---SH-GT**RRVAGLRREEVAVL**  
ClpT -----MIVAMAD**VRSREL**GAY**LRARRDRLS**PADVGLP---DGG**RRVPGLRREEVAVL**  
Orf13 -----M**CR**QAQL**S**PTVGLP---ESR**APRRVPGLRREEVAQL**  
SCO6926 --MCGAIK**DGGEGESTG**IGALL**RRVRAAA**-----G**TT**LGR**PILQRE**VADA  
SCO6539 ---MTALV**SGTSPATDR**GV**PM**LR**AWR**-----ERRR**V**S**Q**LE**L**LR  
Consensus/80% .....LR.RR...P.....RR..GLRREEVA.L

MltR TQLPKRTIERI**EN**GL**LAHL**-DAD**ILLRLADAL**EL**L**TIG**ER**REFFFA**AT**GI**IE**Q**KS**A----T  
SCO7140 CDMSVD**Y**SR**LE**Q**PR**GP**HP**-**SE**Q**MLT**SMAR**GLRLSLE**ER**DL**L**FQ**L**AG**HAL**PR**RA----R  
SCO2501 SAVGV**TWY**T**WLE**Q**ARDI**Q**V**-**SV**Q**LDALAR**T**LL**L**DPT**ER**AHL**F**Q**L**AG**SV**DPT**PA----T  
SCO7817 ALMST**DY**Y**TR**L**EQ**R**GP**Q**P**-**SER**M**L**DSL**ARAL**L**L**TR**AER**D**YL**Y**R**V**AG**HN**AP**AS**L**----S  
SCO0307 ASIS**PGH**Y**TR**L**EQ**RR-**RA**-**SEP**V**LDALARAL**L**L**S**ADER**A**Y**L**FEL**SG**KD**AG**R**PL**G**----R  
SCO0110 AGVGIT**WY**T**WLE**Q**GR**P**INV**-**SS**Q**VLDAVART**L**ILD**AA**ERD**H**L**Y**R**L**A**EV**P**Q**PP**V**IS**----D  
SCO2537 AGVGAS**WY**Q**WLE**Q**GR**DI**SV**-**SP**Q**VLDAVGRV**L**RLS**NT**ERR**H**L**Y**V**L**AG**LN**PP**AA**EV**--E-P  
SCO7767 AQVSV**SY**Y**ER**L**EQ**AR**AP**RP-**SP**Q**VLSALAT**A**L**Q**L**T**DAER**D**H**L**AR**L**AG**Q**V**LP**AE**ND----G  
SCO0236 AGIS**PDY**Y**LR**L**ER**GR**D**K**NP**-**SP**Q**VLES**L**ARV**L**QL**DD**IERT**Y**LL**G**L**AA**R**PR**AP**RR----K  
SCO4680 AGAS**VDY**Y**N**L**ER**G**AG**S**Q**P-**SE**Q**MLAALARAL**L**L**S**ADER**D**YL**Y**R**L**AD**RP**V**VP**PG**----P  
SCO7706 AGVN**ADY**Y**TR**L**EQ**GR**ER**HP-**SP**Q**VL**D**ALGRAL**L**L**D**PEAR**A**HL**H**R**L**AG**V**S**PA**GR**D**S**--L-H  
SCO0233 CHMST**DY**Y**AR**L**ER**ER**GP**Q**P**-**SQ**Q**MIVS**IA**QGL**H**L**SL**DER**D**H**L**F**R**L**AG**H**T**PP**PR**G**----T  
SCO0891 AGIS**VDY**V**TR**L**EQ**GR**AAN**P-**SA**Q**VVEAL**VR**AL**L**PAE**ER**AHL**F**R**L**AG**L**AP**PG**PE**----A  
SCO4944 AGV**S**V**AY**Y**TR**L**EQ**NG**Q**NV-**SA**EV**LD**AI**ARAL**L**L**T**DAE**Q**AHL**TH**L**AR**PK**Q**RR**R**AG**AA-R  
MmyB AGV**S**AS**WY**T**WLE**Q**GR**DI**KV**-**SD**GV**LN**AI**SQAL**R**L**DD**TER**A**HL**Y**R**L**AG**V**N**PP**Q**S**V**P--A-T  
LlpRV AGVN**ADY**Y**TR**L**EQ**GR**ERN**P-**SP**Q**VIDAL**G**HAL**R**L**DE**D**AR**TH**L**Y**R**L**AG**AT**P**GER**P--P-H  
ClpT ANV**SS**W**Y**T**WLE**Q**GR**D**V**RP-**SE**V**LA**AI**ADAL**R**L**SS**ERR**H**L**F**L**G**G**H**P**DA**EP**-P----S  
Orf13 AGIS**TDR**Y**TR**W**EQ**GR**A**-**PV**-**PT**SV**L**AT**L**VR**V**L**HL**DD**Q**R**D**H**L**F**AL**A**K**VE**C**AP**RR**----R  
SCO6926 LHR**SER**W**Y**R**D**L**EG**GV**IT**R**PL**TR**HE**L**D**TIG**T**L**L**G**L**DR**V**Q**R**R**AL**FL**V**S**NG**GL**SS**PE--T-Q  
SCO6539 AD**SS**AR**H**IS**F**W**ET**GR**S**-**RP**-**SE**EM**V**L**R**L**A**EH**L**D**V**VR**ER**N**ALL**L**AG**Y**A**PH**Y**P**ET**PL**DD**P  
Consensus/80% .....Y..LE..R.....S...L.....L.L...ER..L..LA.....

MltR YKRSPEESLQYLIDMIRNMNV**PA**F**V**T**D**Q**V**N**I**IA**N**MITIRFFNIP**MEL**(6)L**PH**G**Y**N**LM**  
SCO7140 RGDH**V**AP**G**T**M**R**I**L**D**R**L**--ED**T**PA**Q**V**M**N**H**L**G**ET**L**S**Q**T**R**P**A**M**T**L**L**G**D**Q**T**A**Y**---T**L**G**L**R**S**S**H**  
SCO2501 DCP**A**IT**P**AV**R**AL**L**EQ**F**--EP**Y**PA**C**V**Q**NS**R**Y**D**I**L**A**H**N**R**T**Y**G**L**L**C**D**L**DA**V**---P**P**ED**R**N**C**M  
SCO7817 DP**S**P**V**AP**AL**L**R**V**L**D**R**L--DD**T**PA**L**I**L**TE**L**GET**L**V**Q**N**R**MA**V**AL**F**D**S**AS**H**---T**L**G**L**R**S**AV  
SCO0307 P**G**R**Q**VR**P**Q**L**RR**L**DD**L**--T**H**T**P**AL**V**L**G**R**C**T**D**I**L**A**W**N**P**PA**A**AL**F**T**D**F**ALL**---S**R**D**ER**N**F**V  
SCO0110 P**P**TE**L**PG**H**L**D**T**V**LE**A**L--D**P**L**P**AM**L**VD**A**R**T**D**V**L**R**W**N**RA**Y**A**A**L**H**PA**L**V**S**A---P**P**G**K**R**N**T**L**  
SCO2537 SKRDM**C**E**G**L**R**R**L**ID**T**W--MP**Y**PA**H**IM**D**R**Y**NC**V**L**Y**N**D**AA**T**V**L**GM---R--P**E**TT**W**N**C**I  
SCO7767 T**P**EH**V**PE**D**A**Q**Q**L**L**G**R**L**--D**G**I**P**A**Y**I**V**N**D**R**Q**D**I**V**A**W**N**AAAA**A**L**I**T**D**F**S**R**L**---T**P**D**ER**N**L**T  
SCO0236 R**P**EH**V**PAR**V**HELL**A**-H--L**P**I**P**A**F**VE**G**RA**F**D**V**L**AS**N**P**MA**V**AL**S**PR**L**R-----P**G**Q**N**R**L**  
SCO4680 -A**S**H**V**HP**G**M**L**D**L**L**G**R**M**--T**S**T**P**A**Q**V**I**T**D**L**H**V**T**L**V**Q**N**PL**A**V**AL**L**G**D**Q**S**G**Y---R**G**PR**AS**F**V**  
SCO7706 A**T**ER**V**GP**AL**R**Q**L**M**D**G**Y--A**H**T**P**A**F**V**M**S**R**T**L**D**V**L**A**AN**AL**AD**AL**Y**A**P**F**T-----P**A**D**N**L**A**  
SCO0233 D**G**EH**I**SP**G**LL**R**I**L**D**R**L--DD**T**PA**E**I**V**TE**L**GET**L**R**Q**T**R**L**G**I**AL**T**G**D**Q**T**R**Y---S**G**PAR**S**I**G**  
SCO0891 V**P**A**Y**I**P**PS**V**H**R**L**L**D**R**L--A**G**T**P**V**A**Y**D**AM**W**T**L**L**AN**PP**Y**A**A**L**M**G**D**P**S**E**W**---H**G**PER**N**G**V**

SCO4944 GKQPVRVALQLLDSI--DTV**PAYV**SGRRSE**ILAWN**RMAA**ALFG**DWGKL---PAAER**NWA**  
MmyB AGQTETSRLQLIVDGW--LPAP**AFV**VDRYWNT**LAAN**QAARSALGV-----GAGDQ**NYL**  
LlpRV SAGRVSPALRQLMDGY--PHT**PAF**VMMNR**TLDL**LAVN**ALAQAL**YSAFT-----PAD**NLA**  
Cltp NCEGTSGRVQTLTLDL--SPH**PAV**VMNPWF**EPLAY**NAPFRFMIDDL**EAL**---PPADR**NCA**  
Orf13 PAQKVQPQLGRLLDLDEL--TGT**PAL**VLGRHMD**ILAWN**ALAA**LLTDFE**HI---PEKKR**NYA**  
SCO6926 EPPRISDELRLLLDQ---QPF**PAY**VIDATWNV**LAVN**TSMA**ALFP**WS-----TAPGAN**NLM**  
SCO6539 ALGALREGMERLIRGY--EPY**PAL**VVDATYR**VLAAN**RGIAM**LMDG**VAEH--LLTPPL**NAI**  
Consensus/80% .....PA.....L..N....L.....N..

Mltr RV**VF**GT**EYDF**RRVVGT--MWDEVARHNM**QLFR**AISLRV--RADGYFV**VELLDN**L**M**-QYRE**EFK**  
SCO7140 YR**WF**TD**PAA**--RLVHPASDHAEQ**SRLM**VADLH**SAYS**SRD--GGDSGAAALVDAL**NRESPE**FA  
SCO2501 V**LCF**TH**EDW**--RSSIV--HLEETQRLMAAR**FR**ATMAGH--LAEP**AWKMLL**KRL**RTQ**SP**AFR**  
SCO7817 YR**WF**TD**PSE**--RSVYPESDWGRQ**SRAQ**VANL**RAAY**GMR--GARSHAGALV**RI**L**QQSNEE**FA  
SCO0307 RLV**FR**DP**AV**--RALYT--DWPYMARAC**V**A**QLR**ME**AARD**--PHDPRLSALV**AE**L**SAQDPD**FR  
SCO0110 W**QLF**AA**PEG**--QPRIV--NRDEQ**APEAV**AG**FR**YR**YSQ**N--AGDPRWQDFV**ARL**RTAS**PLF**S  
SCO2537 LDF**FTD**P**LY**--RSRAR--NWEHNART**VVAQ**F**RAT**CAAN--PDDEGF**QQV**LAD**L**TG**ASAE**FA  
SCO7767 R**I**STRFRG**TLCT**GAPG--SESEFS**QQVAAQ**L**RAAS**VLY--PTDKV**LAE**L**INEFATHD**PD**FA**  
SCO0236 RD**LLD**P**EE**--QEFHQ--DWPKATAD**FVAAL**R**TTI**GDD--TDNPRF**V**ELV**GE**L**SLSSQ**R**FR**  
SCO4680 HR**WF**TE**PEA**--RLLYPEADHAYQ**SRSF**VADL**RAAA**ARRDAKDTEAGAMV**RTL**L**GV**S**PE**FA  
SCO7706 R**MIF**L**D**PAG--REFYQ--EWDRAAQAVVADL**RQ**AHGFD--PEHPRLRRLV**DTL**TEHSA**VFR**  
SCO0233 YR**WF**TD**PAT**--RQLYHPDDHAF**L**TRMFAS**GLR**EVATL**R**--GPGSRAAHYAD**L**L**LAQ**SE**EF**R  
SCO0891 WR**NF**V**G**PGS--RARYTPGERRSFESALVADL**RATA**ARY--PADRRLGRLV**AE**L**RAR**SER**FA**  
SCO4944 RLV**F**L**N**PDY--REL**FV**--DWDQKAYDMV**SFLR**MDAGR**H**--PDDPRLSALV**GE**L**SVK**SE**EF**R  
MmyB AAF**F**TE**PTA**--RARYL--DWDK**L**ATRLV**GQF**R**VQA**ARF--PEDPRFDRIAR**QL**CATDH**AF**A  
LlpRV R**MIF**L**D**PAG--PAFYT--DWDRAAQAVV**ANL**R**EA**TG**F**A--PDDPRLREL**V**GT**L**TEHSP**D**FA  
Cltp YL**H**F**T**HPDW--IAAHS--DHEQ**E**CAAV**VAKL**R**AY**HGES--VTDPAWAP**L**LAR**L**REES**P**L**F**V  
Orf13 RLL**F**TD**PGF**--RVL**Y**P--DWRTIAR**SCV**AHL**R**VEAA**QC**--PGDPELTALV**GE**L**S**VADAD**FR**  
SCO6926 RW**LL**S**AE**A--RDQHL--HWEADA**EV**CV**CMLR**DA**AV**DR--PHDPDL**Q**QL**I**SD**SR**--QNP**AV**R  
SCO6539 RL**TL**HPD**GL**--APR**I**R--NLREWRGH**L**L**EQ**MER**Q**I**AL**H--R--SRPLRELYDE**V**AA**Y**PP**V**ES  
Consensus/80% ...F.....R.....L.....F.

Mltr R**F**WERAHLETEDTSA(4)YQY**TH**PVY**G**LLSYVSSRSQ**I**PT-S---MGLLSMHTYI**P**L**S**PA  
SCO7140 GL**WR**QRPV**L**GPY**CAS**---KRFVHPQ**V**GT**LE**LHC**Q**TLID**PD**-H---GQRLVVY**TAT**PG**TES**  
SCO2501 EAWERHEV**V**AHRG**KR**---KEFLNR**HV**G**R**IRVDHTDL**WL**GP**EP**---GPRM**V**TY**AP**ADED--S  
SCO7817 EL**W**ERHE**V**AQR**F**EDH---K**TLI**H**PEV**G**A**IEVDC**QAL**F**TED**-Q---S**Q**TL**L**V**L**T**AP**PR**TES**  
SCO0307 T**W**W**K**DHR**V**AVRGAGT---KDLR**HP**V**I**G**E**L**T**D**WS**AL**T**D**TAD**P---D**Q**QL**I**AL**T**A**PG**T**PS**  
SCO0110 R**L**W**TT**H**D**V**A**PH**L**CD---KRYDIT**GI**G**EV**SLR**AT**SM**EL**T**D**H**P**---G**V**RL**V**V**Q**T**P**AD**R**--S  
SCO2537 A**L**W**E**ERD**I**E**D**AG**Q**IR---K**EL**D**H**PL**V**G**L**LS**L**ESTAL**Q**V**PAR**P---D**L**T**I**V**L**H**T**P**L**E**A**N**T**  
SCO7767 S**SW**R**N**H**A**VR**P**IP**G**VR---K**R**L**H**H**P**T**L**G**E**L**E**IDR**H**T**L**S**L**P**G**-S---G**F**SL**V**M**Y**T**A**E**V**G**S**P**S**  
SCO0236 T**L**W**A**R**H**EV**R**SLD**G**GS---T**V**H**H**P**V**V**G**DL**H**L**H**R**D**K**L**P**V**E-----D**V**I**L**V**V**Y**P**D**K**D**S**D**S**  
SCO4680 A**L**W**A**D**H**D**V**A**F**RR**H**DR---K**R**L**V**H**P**V**I**G**L**VE**V**N**C**L**N**L**F**S**E**D--G---R**Q**RL**L**W**F**T**P**AV**G**T**S**  
SCO7706 R**L**W**A**E**H**S**V**R**G**K**T**Q**D**A---K**R**L**L**H**P**D**V**G**T**LS**L**T**Y**Q**S**F**D**V**R**D**A**P---G**Q**Q**L**V**I**Y**H**A**E**P**G**S**P**S  
SCO0233 R**V**W**K**E**H**T**V**G**I**R**P**KE**V**---K**H**F**V**H**PE**V**G**A**L**E**L**T**C**Q**T**L**D**P**S**-Q---A**H**M**L**L**V**Y**T**A**PG**G**E**S  
SCO0891 E**L**W**R**A**D**AV**G**R**H**E**A**A**R**---K**T**I**D**H**P**R**V**G**P**V**L**D**C**D**V**L**G**V**A**G--S---D**L**R**I**M**V**Y**T**A**EP**D**T**A**D**  
SCO4944 R**L**W**A**T**H**D**V**K**E**K**S**Y**G**V---K**R**M**R**H**PL**V**G**DL**T**LS**F**ET**F**R**L**V**D**D**D**---E**Q**A**F**I**T**Y**H**A**E**P**G**S**P**S  
MmyB D**L**W**A**R**H**ET**C**D**T**A**M**T**S**---V**R**V**R**PP**G**E**S**M**R**F**E**H**L**I**L**A**L**E**N**A---D**L**R**L**M**L**Y**M**P**R**G**A**H**I**S  
LlpRV R**L**W**R**S**H**T**V**R**G**K**T**Q**D**A---K**R**F**L**H**P**D**I**G**PL**T**L**T**Y**Q**A**F**D**V**R**E**T**P---G**R**Q**L**V**I**Y**H**A**E**P**G**S**P**S  
Cltp R**L**W**E**Q**A**D**V**S**T**E**P**GR**V**---K**R**I**R**S**R**H**V**G**S**LS**V**R**A**I**T**L**L**L**E**EN**P**---R**T**R**V**V**V**Y**Q**P**A**D**R**--T**T**  
Orf13 Q**W**W**A**GR**Q**V**P**Y**L**Q**V**G**S**---K**R**L**S**H**P**V**G**DL**T**L**D**W**S**L**T**S**T**A**D**P---A**Q**Q**L**V**I**M**T**P**E**P**G**T**PS**  
SCO6926 D**L**W**T**R**G**A**A**D**F**A**D**H**Y**D---G**H**V**L**Q-----M**T**L**P**L**F**D**G**Q---V**T**E**L**V**T**H**V**L**Q**P**A**GL**P**  
SCO6539 V**P**G**A**E**P**D**E**P**V**P**Y**F**A**L---P**M**Q**I**E**H**E**G**H**V**LS**F**I**S**S**I**S**T**F**N**T**P**M**D**V**T**V**A**E**L**A**I**E**T**L**L**P**A**D**P**A  
Consensus/80% ..W.....G.....

Mltr T**T**D**L**F**A**K**L**S**T**V**A**N**Q**D**V**I**R**L**A**P**W**R**S**N**G**-----  
SCO7140 H**T**N**L**R**L**L**S**L**P**V**S**-----  
SCO2501 R**E**R**L**E**R**L**H**A**I**A**L**E**R**E**P**A**S**G-----  
SCO7817 H**E**K**L**Q**L**L**A**V**L**G**L**H**R**F**T**E**A**E**D**Q**V**R-----  
SCO0307 H**D**G**L**R**A**L**R**D**L**G**A**V**T**S**G**R**T**G**P**G**V**P**G**G**G**E**I**A**G**A**S**A**Q**-  
SCO0110 R**E**N**I**D**R**L**L**R**Q**A**T**H**L**-----  
SCO2537 A**A**K**L**E**W**L**A**S**P**E**G**R**R**G**A**M**Y**P**V**A**G**-----

|               |                                                  |
|---------------|--------------------------------------------------|
| SCO7767       | AAAL <b>LKSL</b> -----                           |
| SCO0236       | DEK <b>LRLLAGL</b> SHSESAGTPRSGSSTGGRPPQEE---    |
| SCO4680       | AGL <b>LLELSV</b> VGTQEVSEVSAATR TAGSSTRRQG---   |
| SCO7706       | AHAL <b>LGLL</b> GSLHAGERRQGASDSAGN-----         |
| SCO0233       | YEK <b>LQLLSV</b> IGAQTLR-----                   |
| SCO0891       | AER <b>LALLTV</b> LGTQELVE-----                  |
| SCO4944       | ADAL <b>LRLLAS</b> WGTDAASLPA-----               |
| MmyB          | AEAGLR <b>LVPAD</b> PLTRNSLLQLPGRPMTSRPVER ( 4 ) |
| LlpRV         | AQS <b>LNLG</b> S LHATRSQADSPHVAGHP IRRGDRHR--   |
| ClpP          | QER <b>LEELAH</b> R IARGTIDGPARVRHLLAAT-----     |
| Orf13         | HDG <b>LRF LAS</b> WTAAPYERARDTTA-----           |
| SCO6926       | GCRMT <b>ILTQ</b> RAPQEPSPGRQPVQAT-----          |
| SCO6539       | TVKYLQ <b>TLLP</b> -----                         |
| Consensus/80% | ...L..L.....                                     |
