# Supplementary material for: Structure of an MmyB-Like Regulator from C. aurantiacus, Member of a New Transcription Factor Family Linked to Antibiotic Metabolism in Actinomycetes
Source: PubMed Central journal article supplement (PMC3406030; doi:10.1371/journal.pone.0041359), 2012-07-26
Supplement: pone.0041359.s002.pdf [file pone.0041359.s002.pdf]

SCO4944 --MDGQLDRRAELSE**FL**RT**RR**AR**LK**PE**DV**GL**ES**Y**GR**Q**RR**VP**GL**R**REE**LA**Q**LAG**SV**V**AY**Y**T**  
SACE\_1844 -----MDHRT**EL**S**Q****FL**RT**RR**AR**LS**PA**DV**GL**PR**Y**GR**-**RR**VP**GL**R**REE**LA**Q**LAG**SV**V**AY**Y**T**  
FRAAL2385 (6)AG**NT**GR**MT**EL**GD****FL**RS**RR**A**QL**T**PE**D**V**GL**SR**Y**GER****RR**VP**GL**R**REE**I**A**Q**LAG**SV**VT**Y**YT**  
KSE\_00670t -----MD**TP**SV**LG**D**FL**RS**RR**AR**LQ**PE**DV**GL**RA**Y**GAR****RR**VP**GL**R**REE**LA**Q**LAG**SV**V**TH**Y**T**  
caci\_7725 (8)DRR**ID**RR**AE**L**SE****FL**RS**RR**AR**LN**P**GD**V**GL**PD**Y**G**GR****RR**VP**GL**R**REE**LA**L**TAG**SV**V**D**H**Y**V  
AMED\_8063 -----M**MS**DA**AE**L**G**A**FL**K**ARR**A**LD**PA**D**L**GL**PP**GV**T**Q****RR**V**K**GL**R**REE**LA**Q**LAG**I**SV**D**Y**Y**T**  
Micau\_3909 -----M**AG**-H**SD**L**GR****FL**R**QC**R**AD**L**T**PE**AV**G**IA**AV**AQ**G**RR**V**R**GL**R**REE**V**ALL**AG**SV**VD**Y**YT**  
Amir\_0367 -----M**AQ**N**NA**EL**AD****FL**K**R**AR**AQ**GD**PER**AG**L**PP**D**GR**V****RR**VP**GL**R**REE**V**AR**LAG**SV**TD**Y**Y**T**  
Msmeg\_0523 -----M**SD**R**K**TE**LA**E**FL**S**ARR**AR**L**T**PE**E**V**GL**EQ**P**G**T**RR**VP**GL**R**REE**L**ALL**LAG**SV**V**D**Y**YT**  
Sros\_3720 -----M**D**H**NA**EL**RE****FL**RT**RR**AR**LS**P**QQ**A**GV**PA**T**G**GT****RR**VP**GL**R**REE**L**AR**LAG**SV**V**D**Y**YT**  
Aaur\_2039 -----M**DN**R**T**ET**RD****FL**AT**RR**A**K**IT**PE**EQ**GL**A**AY**G**GN****RR**VP**GL**R**RG**E**V**AM**LAG**SV**VE**Y**YT**  
Krad\_2718 ---M**AV**MD**NR**A**EV**RD**FL**T**TR**A**K**IT**PE**AE**AG**L**PD**V**G**-**PR**VP**GL**R**RA**E**AA**LAG**SV**E**Y**Y**A**  
Gobs\_1568 ---M**V**AV**D**TR**K**DL**RD****FL**AT**RR**A**R**IT**P**Q**Q**A**GL**PT**Y**G**GH****RR**VP**GL**R**REE**V**ALL**LAG**SV**E**Y**Y**T**  
RO00570 ---M**S**ST**DL**R**TE**I**RE****FL**ST**RR**A**R**IT**PE**Q**S**GL**P**V**F**G**GN****RR**V**K**GL**R**REE**V**AM**LAG**SV**VD**Y**Y**V  
CgR\_0165 -----M**N**L**H**SD**ARE****FL**K**S**RR**DR**VT**P**Q**AA**GL**PS**Y**GR**N**RR**VP**GL**R**REE**V**ALL**LAG**SV**V**D**Y**YT**  
Consensus/80% .....**FL**..**RRA**...**P**...**GL**...**G**..**RR**VP**GL**R**REE**..**A**..LAG**SV**..**Y**Y**T**

SCO4944 **RLE**Q**NG**Q**N**V**SAE**V**L**D**AI**A**R**A**L**R**L**T**DA**E**Q**A**HL**T**H**L**AR**P**K**Q**Q**---**RR**R**GA**A**RG**K**Q**P**V**R**V**  
SACE\_1844 **RLE**Q**G**H**A**Q**N**V**S**E**V**L**G**A**I**C**D**A**L**R**LD**Q**A**E**R**D**H**L**R**N**L**V**R**P**V**R**K**---**RR**R**S**---**AQ**Q**R**V**R**P  
FRAAL2385 **RLE**Q**Q**S**R**N**AS**D**AV**L**D**A**L**A**R**V**L**R**L**T**DE**T**A**Y**L**H**GL**T**R**P**AAA**---**RR**A**S**---**R**PE**H**V**R**P  
KSE\_00670t **RLE**Q**Q**S**T**N**AS**D**AV**L**D**A**L**A**R**A**L**R**L**N**T**D**E**T**A**H**L**R**D**L**AR**P**A**P---**AR**P**A**P**L**--**R**P**D**Y**AR**P  
caci\_7725 **RLE**Q**G**R**A**V**Q**F**S**E**E**V**L**D**A**V**A**R**A**L**R**L**D**P**T**E**C**E**H**L**Y**R**L**A**R**P**Y**S**A**Q**V**Y--**Q**G**T**G**K**R--**E**P**Q**K**V**R**P**  
AMED\_8063 **RLE**Q**G**R**A**K**N**V**S**E**A**I**L**G**A**L**A**R**A**L**R**L**D**A**G**E**S**Y**L**R**N**L**A**A**P**-----**K**R**R**E**K**S--**A**P**Q**R**V**R**P**  
Micau\_3909 **RLE**Q**G**R**H**T**S**P**S**A**A**V**D**A**L**A**R**V**F**R**L**D**A**A**R**A**HL**A**D**L**A**R**P**A**R**---**R**S**S**R**Q**--**M**P**A**Q**R**V**R**P  
Amir\_0367 **RLE**Q**G**R**R**I**V**P**S**P**A**V**D**A**L**G**R**A**L**G**L**D**D**A**G**Q**A**H**L**R**D**L**I**G**V**G---**P**V**G**R**R**R**T**T**G**A**Q**R**L**R**P**  
Msmeg\_0523 **RLE**Q**G**R**S**R**S**A**S**A**D**V**L**D**A**L**A**A**L**Q**L**D**D**A**E**R**A**H**L**H**T**L**A**K**P**Q---**P**A**Q**R**K**R**R**S**K**P**Q**M**V**D**P**  
Sros\_3720 **RLE**Q**G**R**H**L**N**V**S**E**S**V**L**D**A**V**A**R**A**L**R**L**D**G**V**E**R**A**Y**L**F**E**L**S**R**S**K**P**R**---**P**T**R**R**A**P**T**R**P**Q**R**V**R**P  
Aaur\_2039 **R**L**E**R**G**N**L**S**G**V**S**E**S**V**L**E**S**L**A**G**A**L**Q**L**D**D**A**E**R**A**H**L**Y**D**L**A**R**A**S**D**G**---**G**K**S**R**R**R**P**V**R**K**Q**A**I**R**P**  
Krad\_2718 **K**L**E**R**G**A**L**A**G**V**S**A**S**V**L**E**S**L**A**R**A**F**R**L**D**D**A**E**R**T**H**L**F**D**L**A**S**A**D**G**T**S**A**L**A**R**P**R**R**R**S**T**S**R**S**W**A**R**P**  
Gobs\_1568 **R**L**E**R**G**N**A**N**G**V**S**D**S**V**L**E**A**L**A**R**V**L**Q**L**D**D**A**E**R**A**H**L**Y**D**L**T**R**G**M**T**A**---**A**R**S**R**R**P--**A**R**P**G**V**R**P**  
RO00570 **R**M**E**R**G**N**L**A**G**A**S**D**S**V**L**D**A**L**V**S**A**L**Q**L**D**D**A**E**R**D**H**L**F**A**L**A**R**Q**A**S---**T**T**R**R**P**R**T**P**L**V**T**V**R**P  
CgR\_0165 **R**L**E**R**G**N**L**S**G**V**S**E**E**V**L**A**A**V**A**G**A**L**Q**L**D**E**A**E**R**S**H**L**F**D**L**A**K**A**T**N**S**Q(4)**R**N**T**R**G**A**T**R**A**Q**E**K**V**R**P**  
Consensus/80% **R**L**E**..**G**....**S**...**V**L..**A**..**A**..**A**L..**L**D..**E**..**H**L...**L**.....**R**P

SCO4944 **A**L**L**Q**L**L**D**S**I**D**T**--**V**P**A**Y**V**S**G**R**R**S**E**I**L**A**W**N**R**M**A**A**L**F**G**---**D**W**G**K**L**P**A**---**A**E**R**N**W**A**R**L  
SACE\_1844 **A**L**Q**L**I**D**A**M**E**S--**T**P**A**I**V**L**G**R**R**L**D**I**L**G**W**N**R**L**A**C**A**L**L**G---**D**F**P**A**M**E**P**---**G**R**R**N**L**A**R**Q  
FRAAL2385 **S**I**R**L**L**D**E**L**R**N--**S**P**A**L**V**I**G**R**R**N**D**V**L**A**W**N**R**L**G**H**A**L**L**C**S**H**L**P**A**D**A**P**Q**R**C**H---**G**R**P**N**L**A**R**E  
KSE\_00670t **A**A**A**Q**L**I**A**A**M**T**D**--**V**P**A**V**I**L**D**R**R**N**D**V**L**A**W**N**P**L**G**H**A**L**L**A**G**H**I**D**Y**T**A**P**Q**S**P**S---**E**R**P**N**L**T**R**M  
caci\_7725 **G**L**R**R**L**E**S**A**T**D--**V**P**A**Y**V**V**L**G**T**D**V**L**A**W**N**Q**L**A**A**L**L**I---**D**F**G**T**L**A**P**---**H**E**R**N**L**A**W**L  
AMED\_8063 **E**L**Q**H**L**D--**A**V**Q**--**T**P**A**F**V**F**G**R**Y**L**D**V**L**A**W**N**A**L**G**A**V**S**F**---**D**F**G**R**L**E---**E**R**S**M**P**K**L**  
Micau\_3909 **A**M**H**Q**L**L**A**S**M**T**E**--**H**P**A**L**I**L**G**R**R**T**D**V**L**A**S**N**A**L**G**R**A**L**L**T---**D**W**T**L**L**P**P**---**R**H**R**N**Y**I**R**W  
Amir\_0367 **G**V**H**Q**L**F**D**S**L**D**G**--**V**P**A**L**A**L**G**R**R**T**D**V**L**A**N**R**L**A**R**A**L**F**T**---**D**F**E**A**I**P**A**---**P**R**R**N**Y**A**R**W  
Msmeg\_0523 **V**T**L**R**L**E**L**L**D**Q**S**H**S**P**A**F**V**L**G**R**R**L**D**V**L**A**H**N**R**L**A**G**A**L**I**T---**E**F**R**E**L**P**A**---**P**Q**R**N**Q**A**R**F  
Sros\_3720 **G**L**H**R**I**L**D**A**L**A**G**--**A**A**P**A**F**I**L**G**R**R**M**D**V**L**A**S**N**R**L**A**R**A**L**I**T**---**D**F**D**A**L**P**Q**---**R**E**R**N**L**A**R**Y  
Aaur\_2039 **G**V**Q**L**T**L**D**A**I**S**G**--**S**P**A**F**I**R**N**G**R**L**D**L**A**T**N**A**L**G**R**A**L**Y**A**D**I**Y**D**S**P**A**G**P---**P**N**H**A**R**F  
Krad\_2718 **G**L**Q**W**A**L**D**A**F**T**A**--**G**P**A**I**V**R**N**G**R**M**D**L**A**T**N**T**L**G**W**A**M**H**S**S**L**Y**A**S**L**D**A**A**G**G**G**---**T**H**P**N**F**A**R**Y  
Gobs\_1568 **G**V**Q**Q**L**D**A**M**T**V--**V**P**A**F**V**Q**N**A**R**L**D**V**P**A**A**N**P**L**A**R**A**L**Y**A**D**L**F**D**D**A**E**P**G**S**A**G---**R**T**P**N**H**A**R**Y  
RO00570 **A**I**Q**V**L**D**A**I**T**D--**A**P**A**W**V**R**N**G**R**H**D**I**I**A**M**N**D**L**A**R**A**L**Y**S**P**V**L**A**D**P**R**R**P**---**A**N**T**T**R**F  
CgR\_0165 **E**V**Q**R**I**L**D**A**M**A**D**--**T**P**A**F**I**L**T**D**R**A**D**M**L**T**N**Q**L**G**R**A**L**F**A**P**L**Y**D**S**P**V**S**P**G**T**S**Q**A**E**T**V**N**I**A**R**F**  
Consensus/80% .....**L**.....**P**A.....**R**..**D**..**L**A..**N**..**L**..**A**L.....**N**..**R**..

SCO4944 **V**F**L**N**P**D**Y**--**R**E**L**F**V**D**W**D**Q**K**A**Y**D**M**V**S**F**L**R**M**D**A**G**R**H**P**D**D**P**R**L**S**A**L**V**G**E**L**S**V**K**S**E**E**F**R**R**L**W**A**T**H  
SACE\_1844 **V**F**L**E**P**A**A**--**R**E**F**V**D**W**T**A**K**E**I**V**A**L**R**L**R**D**A**G**R**H**P**D**D**E**A**L**C**A**L**V**E**L**S**G**R**S**E**V**F**S**R**L**W**A**D**R  
FRAAL2385 **F**V**L**E**A**H**A**--**R**D**L**F**V**D**W**R**R**K**V**D**D**V**V**A**L**R**L**S**S**G**M**H**P**D**D**T**K**L**N**A**L**I**G**E**L**C**V**K**S**E**L**F**A**T**L**W**A**R**H**  
KSE\_00670t **L**F**L**D**E**H**T**--**R**E**L**H**T**A**W**E**D**E**A**K**T**S**V**A**A**L**R**L**T**A**G**R**H**P**D**D**R**R**L**A**E**L**I**Q**L**A**M**K**S**D**E**F**A**G**M**W**S**R**H**  
caci\_7725 **L**C**H**D**E**G**F**--**R**A**L**F**T**D**P**V**A**K**M**Q**D**I**A**A**Y**L**R**L**D**I**G**R**H**P**D**D**P**A**L**G**T**L**I**A**E**L**C**R**D**A**D**--**F**A**E**W**A**R**H**  
AMED\_8063 **V**F**T**D**E**R**A**--**K**Q**L**H**P**E**W**D**A**V**C**R**D**V**V**A**N**L**R**A**E**R**G**K**H**P**D**D**P**H**F**A**R**L**A**G**E**L**S**V**A**S**E**R**F**R**E**L**W**A**E**H  
Micau\_3909 **V**F**L**D**P**G**A**--**R**D**A**F**L**D**W**P**A**V**A**A**D**V**G**T**L**R**L**Y**A**G**R**N**P**D**D**P**Q**L**S**E**L**V**G**E**L**S**I**K**S**P**E**F**F**R**A**W**N**G**R**  
Amir\_0367 **M**F**L**D**P**A**A**--**R**A**L**F**A**D**W**E**A**Q**A**R**N**A**V**E**S**L**R**L**E**V**G**R**D**P**G**D**R**A**T**L**A**L**A**E**L**R**E**L**S**P**E**F**D**R**W**E**Q**H

Msmeg\_0523 VFFDPHA-RELYADWDEVAADTVAMLRDLAAGRYPDDDKLSALVGELSIRSEEFRRSWSDH  
Sros\_3720 MFLDEAA-RELHVWDGAAVETVAI LRDLAAGRHPDDPQLAELVGELAVKSEEFRTWWADH  
Aaur\_2039 LFLDPRS-HDFYTDWERAANDTVAIMRTEAGRDPYDRGLSDLVGELSTRSEEFRRVWASH  
Krad\_2718 TFLDADA-RRFYPDWATAAATCVSILRTEAGRDPHDKVMHDLVGELSTRSEEFRALWSSH  
Gobs\_1568 AFLDARA-TDFYPDWNRVAADIVSQLRAEVGRSPDDRELTTELIGELTTRSQHFSTLWATH  
R000570 VYLHPQAAEEFFVVDYDTIARDAAAMLRLLEAGRNPDKALIALVGELSTQSELFRQRWASQ  
CgR\_0165 TFLDPVA-REFFPHWEHNAADLAASLRSTAGRHPHDTVFSNLIGELATR SQDFAQLWADH  
Consensus/80% .FL.....DW...A...V...LR...GR.P.D.....L.GEL...S...F...W..H

SCO4944 DVKEKSYGVKRMRHPLVGDLTLSFETFRLVDDDEQAFITYHAEPGSPSADALRLLASWGT  
SACE\_1844 DVRLDGYGRKQLRHPLVVGPI TLAYETMHLDPDP-QKVIAYHAEPGSPSSESLNLLATSTL  
FRAAL2385 PVRDCTNTVREFRHPLVGRLT LFEVVMRLP-DAGQRIVVMTAEPGSASAENQLLLASLDL  
KSE\_00670t PVRSCFTGKLLHHPFVGAL ELSFESMQLADD SGQRMLAY SAPAGSPSQAGLQLLAGTLL  
caci\_7725 DVRDKTHGSYTYRNPVVGELITLDYETFRAEPD DPQALILQTAPEGSPGEAALQLLAWPQ  
AMED\_8063 AVQEKARGWKLIMNPVVGELRLRYETLRLPDDPDQGLVMYHAEPGSASERALGLLASWIA  
Micau\_3909 HVHERTHGTKRMHHPAVGPI TLRYEALVLP GDDPDTLFLYTTDPGSPSYDNLRLGSLAA  
Amir\_0367 RVHQRTHGSKRLTHPLVGE LTV EYETVALPGDDPDTLFLYTTAAGTASRQALDLL---AS  
Msmeg\_0523 TVKQRTVGT KAYHHPVGD L AVTYQALNPSGDDPDQTLFIYTTEPGSPDETALRLLANWHE  
Sros\_3720 NVRERTHGTRRYHHPVVGELVLSHESVTFPGDADQTMCVYTTEPGSPSEAAHLLLATWTA  
Aaur\_2039 NVRQHYTGK KHFHRRI VGD L HLLYEAL ELSADAGLTLTVYNAEPGTGTADALQLLAWAA  
Krad\_2718 DVRLHGAGTKRFHHTAVGELDLAYESLEMVAEPGLTTLTYAAEPA SPTAQALDLLATWAA  
Gobs\_1568 NVRWHTTGTKRFHHPVGD L T LAYEGMALTADRGQTLITFTAEPGSPSQALAFLLASWAT  
R000570 DVRFHRSGRKRLRHPSVGD L D LDFEAL ELPSEPLQLNIYTAAAGTSPADALKLLASWAA  
CgR\_0165 NVRLHRVGRKTLHHPVGD L E LDFETLILPADDPDQSLIVYSAAPGS DAAQNLRLLASWTV  
Consensus/80% .V.....G.K...HP.VG.L.L..E.....D.....Y....GS.....L.LLA....

SCO4944 DAAASLPA-----  
SACE\_1844 VPAG-----  
FRAAL2385 TAAAPGPQRLPADPAPGGGPGTGGG(16)  
KSE\_00670t SHPPHG-----ARPAARG--HLAGE(5)-  
caci\_7725 TVTAS-STAP-----  
AMED\_8063 EAPLTRANFPSL-----  
Micau\_3909 RTAPAPGRASSTPLPDASRTEPNPS----  
Amir\_0367 WTLTALAR-----  
Msmeg\_0523 GGEQGSRAASARKSSEA-----  
Sros\_3720 PHPPVTALRQDQGQREE-----  
Aaur\_2039 TALTIPEDSGAYRDISNTSSRSRDRG----  
Krad\_2718 TER-LTHDASSRVDRSSTP-----  
Gobs\_1568 SPTQRAAQDRANEDHTT-----  
R000570 SQDQLGTEHDAPSRPH-----  
CgR\_0165 TGTDKTGTDRAFHPADDVPSLEE-----  
Consensus/80% .....
