# Supplementary material for: Structure of an MmyB-Like Regulator from C. aurantiacus, Member of a New Transcription Factor Family Linked to Antibiotic Metabolism in Actinomycetes
Source: PubMed Central journal article supplement (PMC3406030; doi:10.1371/journal.pone.0041359), 2012-07-26
Supplement: pone.0041359.s003.pdf [file pone.0041359.s003.pdf]

| Paralog         | Divergently transcribed gene | Intergenic region bp | Predicted function of gene product(s)                                                                     | Comment                                                   |
|-----------------|------------------------------|----------------------|-----------------------------------------------------------------------------------------------------------|-----------------------------------------------------------|
| <b>Family 1</b> |                              |                      |                                                                                                           |                                                           |
| <i>mmyB</i>     | <i>mmyY</i>                  | 230                  | Nuclear transport factor 2-like protein                                                                   | Methylenomycin biosynthesis                               |
| <i>SCO0110</i>  | <i>SCO0111</i>               | 187                  | 3-ketoacyl-(acyl-carrier-protein) reductase                                                               |                                                           |
| <i>SCO0233</i>  | <i>SCO0234-SCO0235</i>       | 289                  | Both genes encode an SDR                                                                                  |                                                           |
| <i>SCO0236</i>  | <i>SCO0237</i>               | 200                  | SDR                                                                                                       |                                                           |
| <i>SCO0307</i>  | <i>SCO0306</i>               | 123                  | Possible pseudogene                                                                                       | SCO0311 PKS; SCO0312 acyl-CoA reductase                   |
| <i>SCO0891</i>  | <i>SCO0890</i>               | 102                  | SDR                                                                                                       |                                                           |
| <i>SCO2501</i>  | <i>SCO2502</i>               | 111                  | Similar to actinorhodin exporter ActII-2                                                                  |                                                           |
| <i>SCO2537</i>  | <i>SCO2537</i>               | 107                  | Similar to cephamycin transporter CmcT from <i>Nocardia lactamdurans</i>                                  | Fused to SCO2538                                          |
| <i>SCO4680</i>  | <i>SCO4681-SCO4682</i>       | 45                   | SDR, downstream gene encodes 4-oxalocrotonate tautomerase                                                 |                                                           |
| <i>SCO4944</i>  | <i>SCO4945</i>               | 169                  | MDR (alcohol dehydrogenase)                                                                               | Highly conserved <sup>^</sup>                             |
| <i>SCO6926</i>  | <i>SCO6925</i>               | 582                  | Membrane protein; gene contains TTA codon                                                                 | Possibly controls lantibiotic cluster <i>SCO6927-6930</i> |
| <i>SCO7140</i>  | <i>SCO7141</i> <sup>#</sup>  | 28                   | SDR                                                                                                       |                                                           |
| <i>SCO7706</i>  | <i>SCO7707</i>               | 138                  | Atu4866 family protein                                                                                    | SCO7705 similar to tetracyclin resistance oxidoreductase  |
| <i>SCO7767</i>  | <i>SCO7768-SCO7769</i>       | 130                  | Nuclear transport factor 2-like protein, similar to RANGDP-binding; fused to gene for GDP-sugar epimerase | Next to <i>SCO7766</i> , homolog of <i>actVA4</i>         |
| <i>SCO7817</i>  | <i>SCO7818</i>               | 117                  | SDR (2,3-dihydro-2,3-dihydroxybenzoate dehydrogenase)                                                     |                                                           |
| <b>Family 2</b> |                              |                      |                                                                                                           |                                                           |
| <i>SCO6539</i>  | <i>SCO6540-SCO6541</i>       | 90                   | DCoH domain protein; downstream gene similar to <i>S. purpurascens rdmD</i> (anthracycline biosynthesis)  | Highly conserved in <i>Streptomyces</i>                   |

<sup>#</sup> no shared promoter region.

<sup>^</sup> next to ortholog of *SCO4945* in all *Streptomyces* sp, *Rhodococcus* sp, *Saccharopolyspora erythraea*, *Kineococcus radiotolerans*, *Arthrobacter aurescens*.
